# Supplementary material
Source: publisher site journal article supplement (https://www.spandidos-publications.com/1850/downloadSupplementary)

Figure S1. Annexin V/propidium iodide analysis for cell apoptosis. A total of three repetitions were performed for sh-NC cells and sh-lncRNA cells. sh, short hairpin; NC, negative control; lnc, long non-coding.

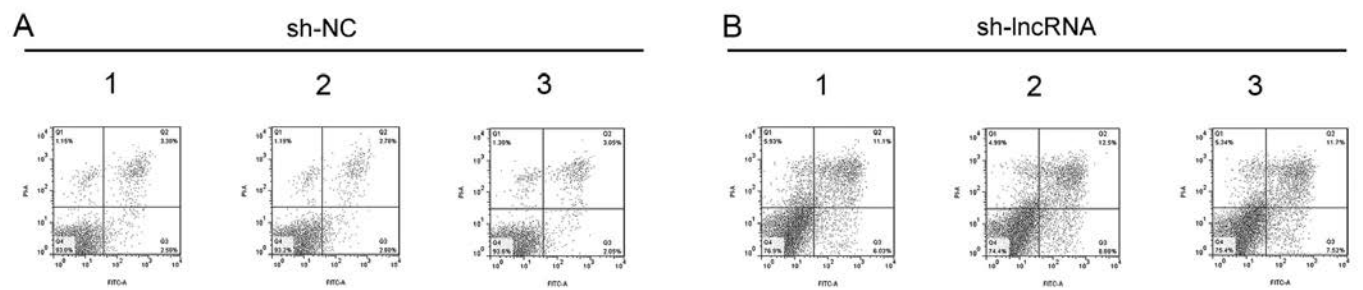

Supplement: Supplementary file 1 [file downloadSupplementary]
